# Supplementary material for: Acute healthcare resource utilization by age: A cohort study
Source: PLoS One. 2021 May 19;16(5):e0251877. doi: 10.1371/journal.pone.0251877 (PMC8133481; doi:10.1371/journal.pone.0251877)

**S4 Fig.** Annual number of hospital admissions by age over time stratified by sex

1. Annual number of hospital admissions for men by age over time


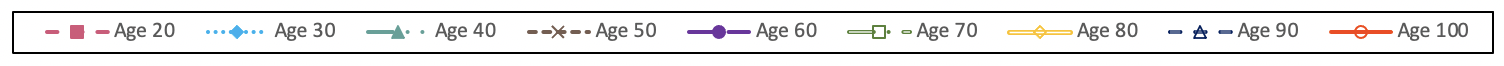


1. Annual number of hospital admissions for women by age over time


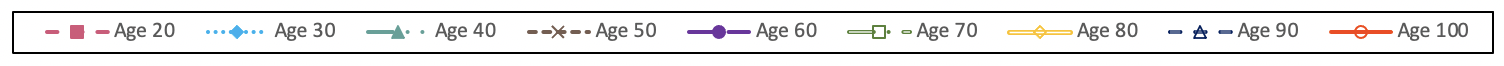

Supplement: S4 Fig — (DOCX) [file pone.0251877.s004.docx]
